# Supplementary material
Source: PubMed Central journal article supplement (PMC7687959)
Supplement: boe-11-11-6551-s001.pdf [file boe-11-11-6551-s001.pdf]

## Towards detection of brain injury using multimodal non-invasive neuromonitoring in adults undergoing extracorporeal membrane oxygenation: supplement

IRFAAN A. DAR,<sup>1,\*</sup> IMAD R. KHAN,<sup>2</sup> ROSS K. MADDOX,<sup>1,3</sup> OLGA SELIOUTSKI,<sup>4</sup> KELLY L. DONOHUE,<sup>2</sup> MARK A. MARINESCU,<sup>5</sup> SUNIL M. PRASAD,<sup>6</sup> NADIM H. QUAZI,<sup>7</sup> JACK S. DONLON,<sup>1</sup> EMILY A. LOOSE,<sup>7</sup> GABRIEL A. RAMIREZ,<sup>1</sup> JINGXUAN REN,<sup>1</sup>  JOSEPH B. MAJESKI,<sup>1</sup> KENNETH ABRAMSON,<sup>8</sup> TURGUT DURDURAN,<sup>9,10</sup>  DAVID R. BUSCH,<sup>11,12</sup>  AND REGINE CHOE<sup>1,13</sup> 

<sup>1</sup>Department of Biomedical Engineering, University of Rochester, Rochester, New York 14620, USA

<sup>2</sup>Department of Neurology, Division of Neurocritical Care, University of Rochester Medical Center, Rochester, New York 14642, USA

<sup>3</sup>Department of Neuroscience, University of Rochester, Rochester, New York 14620, USA

<sup>4</sup>Department of Neurology, Division of Epilepsy, University of Rochester Medical Center, Rochester, New York 14642, USA

<sup>5</sup>Department of Medicine, Division of Cardiology, University of Rochester Medical Center, Rochester, New York 14642, USA

<sup>6</sup>Department of Surgery, Division of Cardiac Surgery, University of Rochester Medical Center, Rochester, New York 14642, USA

<sup>7</sup>Department of Biology, University of Rochester, Rochester, New York 14620, USA

<sup>8</sup>Department of Physics and Astronomy, University of Pennsylvania, Philadelphia, Pennsylvania 19104, USA

<sup>9</sup>ICFO-Institut de Ciències Fotòniques, The Barcelona Institute of Science and Technology, Castelldefels (Barcelona), 08860, Spain

<sup>10</sup>Institució Catalana de Recerca i Estudis Avançats (ICREA), Castelldefels (Barcelona), 08015, Spain

<sup>11</sup>Department of Anesthesiology and Pain Management, University of Texas Southwestern Medical Center, Dallas, Texas 75390, USA

<sup>12</sup>Department of Neurology, University of Texas Southwestern Medical Center, Dallas, Texas 75390, USA

<sup>13</sup>Department of Electrical and Computer Engineering, University of Rochester, Rochester, New York 14620, USA

\*[idar@ur.rochester.edu](mailto:idar@ur.rochester.edu)

---

This supplement published with The Optical Society on 19 October 2020 by The Authors under the terms of the [Creative Commons Attribution 4.0 License](https://creativecommons.org/licenses/by/4.0/) in the format provided by the authors and unedited. Further distribution of this work must maintain attribution to the author(s) and the published article's title, journal citation, and DOI.

Supplement DOI: <https://doi.org/10.6084/m9.figshare.13042127>

Parent Article DOI: <https://doi.org/10.1364/BOE.401641>

# Towards Detection of Brain Injury Using Multimodal Non-Invasive Neuromonitoring in Adults Undergoing Extracorporeal Membrane Oxygenation: supplemental document

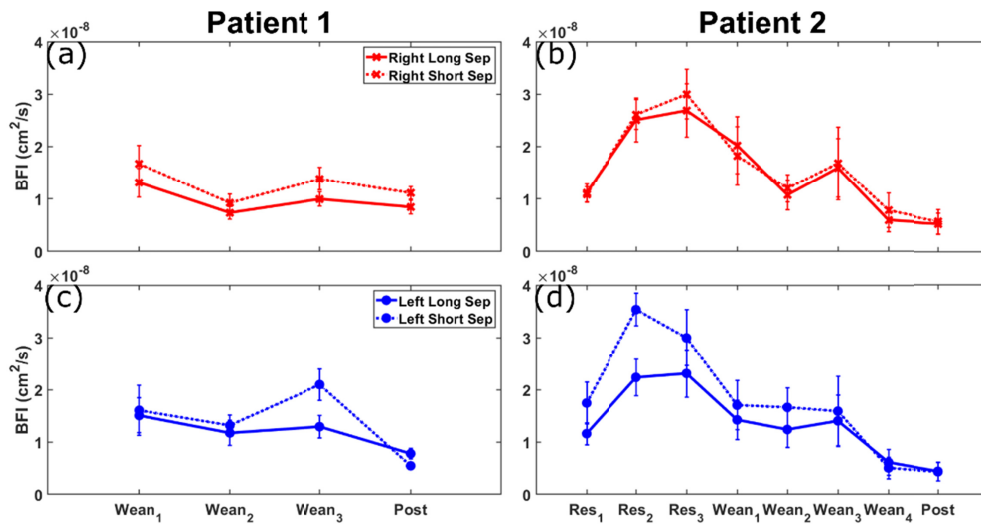

Figure S1: Comparison of short separation (dashed) and long separation (solid) channels for the right hemisphere for (a) patient 1 and (b) patient 2 and left hemisphere for (c) patient 1 and (d) patient 2.

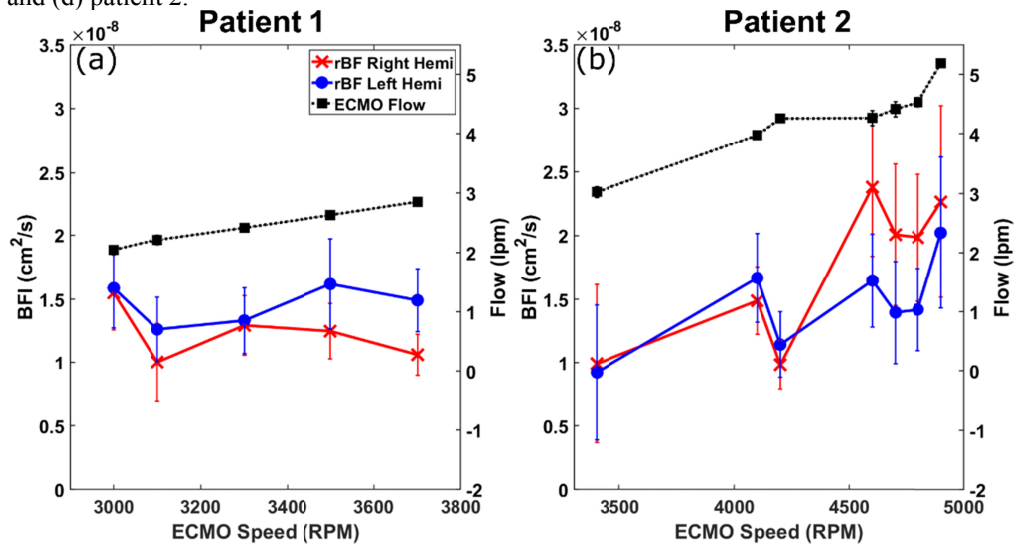

Figure S2: Average BFI and ECMO flow at different ECMO speeds for (a) patient 1 and (b) patient 2.
